# Supplementary material for: Enhanced photocatalytic activity of a flower-like In2O3/ZnGa2O4:Cr heterojunction composite with long persisting luminescence
Source: Royal Society of Chemistry journal article supplement (doi:10.1039/d2ra05646a), 2022-01-01
Supplement: d2ra05646a1.pdf [file d2ra05646a1.pdf]

## **Enhanced photocatalytic activity of flower-like $\text{In}_2\text{O}_3/\text{ZnGa}_2\text{O}_4:\text{Cr}$**

### **Heterojunction composite with a long persistent luminescence**

Ailijiang Tuerdi, Peng Yan, Fenggui He and Abdukader Abdukayum\*

Laboratory of Xinjiang Native Medicinal and Edible Plant Resources Chemistry, College of Chemistry and Environmental Sciences, Kashi University, Kashi 844000, China

E-mail: abdukadera@sina.com,

Tel: +86-13579073366

#### **Table of Contents**

- 1. Experimental Section**
- 2. Table S1- Table S2**
- 3. Figure S1-Figure S8**
- 4. References**

## 1. Experimental Section

### 1.1 Materials and reagents

All reagents were used as received without further purification, Ga<sub>2</sub>O<sub>3</sub> (99.99%), Zn(NO<sub>3</sub>)<sub>2</sub>·6H<sub>2</sub>O (99.99%), Cr(NO<sub>3</sub>)<sub>3</sub>·9H<sub>2</sub>O (99.95%), InCl<sub>3</sub>·4H<sub>2</sub>O (99.9%), ethylene glycol and Sodium dodecyl sulfonate were purchased from Aladdin (Shanghai, China). urea, concentrated nitric acid and aqueous ammonia (15 wt.%) was purchased from Shanghai Chemical Reagent. Ultrapure (ULPHW) water was used to prepare all solutions and in the photocatalytic tests.

### 1.2 Preparation of the In<sub>2</sub>O<sub>3</sub>/ZnGa<sub>2</sub>O<sub>4</sub>:Cr composite

The In<sub>2</sub>O<sub>3</sub>/ZnGa<sub>2</sub>O<sub>4</sub>:Cr composites were prepared using a two-step hydrothermal method<sup>[1]</sup>. First, flower-like In<sub>2</sub>O<sub>3</sub> microspheres were synthesized. A typical synthesis process is described as follows: 0.391 g of InCl<sub>3</sub>·4H<sub>2</sub>O was dissolved in 80 mL of ULPHW. Then, 1.09 g of C<sub>12</sub>H<sub>25</sub>NaO<sub>4</sub>S and 0.4 g of CH<sub>4</sub>N<sub>2</sub>O were added to the transparent solution and stirred for 60 min at room temperature. Thereafter, the mixture solution was transferred to a 100-mL Teflon-lined stainless steel autoclave in an ambient environment and heated at 120 °C for 12 h. After the autoclave was cooled to room temperature, the white precipitates formed were separated by centrifugation, washed with distilled water and absolute ethanol several times, and dried in air at 80 °C for 8 h. Finally, the dried precipitates were annealed in air at 500 °C for 2 h with a heating rate of 10°C/min, and pure flower-like In<sub>2</sub>O<sub>3</sub> microspheres were obtained.

Subsequently, 100 mg of In<sub>2</sub>O<sub>3</sub> was ultrasonically dispersed in 10 mL of C<sub>2</sub>H<sub>6</sub>O<sub>2</sub> for 30 min. The mixed solution was stirred at room temperature for 30 min. Then, it was added to 1.99 mL of Ga<sup>3+</sup> (0.2 molL<sup>-1</sup>), 1 mL of Zn<sup>2+</sup> (0.4 molL<sup>-1</sup>), 0.4 mL of Cr<sup>3+</sup> (0.01 molL<sup>-1</sup>) and stirred for 30 min. The pH of the mixture was then adjusted to 9 using aqueous NH<sub>3</sub> (15 wt%) and stirred at room temperature for 30 min. The resulting mixture was transferred to a 20-mL Teflon-lined stainless steel autoclave in an ambient environment and heated at 170°C for 24 h. The purified products were separated by centrifugation, washed with distilled water and ethanol, and dried in a vacuum oven at 60°C for 12 h. Finally, the sample was annealed at

700°C in N protection for 3 h with a heating rate of 5°C/min.

### **1.3 Sample characterization**

The crystal structure of the obtained samples was characterized by XRD on a Bruker D8 Focus Advance X-ray diffractometer with Cu-K $\alpha$  radiation ( $\lambda = 0.15406$  nm, receiving slit, 0.2 mm, scintillation counter, 40 mA, 40 kV) with scattering angles of 10–80° at a step of 0.03. Micro structures were determined by JEOL SU8220 field-emission scanning electron microscopy (FESEM) which was equipped with an energy-dispersive spectroscopy (EDS) spectrometer to analyze the chemical composition and JEOL JEM-2100 high-resolution transmission electron microscopy (HRTEM) at an accelerating voltage of 200 kV. The X-Ray photoelectron spectra (XPS) were recorded on a Thermo Scientific Escalab 250Xi X-ray photoelectron spectrometer, and the binding energy (BE) calibration of the spectra has been referred to the carbon 1s peak, located at BE = 284.8 eV. The excitation and emission spectra and the long-lasting luminescence decay curves were obtained at room temperature using a F-4500 fluorescence spectrophotometer (Hitachi, Japan). The NIR afterglow decay images of ZGSO: Cr were obtained by a Lumazone FA LUMO Imaging System (PI, Roper Technologies, Inc. America) equipped with a cooled CCD camera with an exposure time of 10–600 s. The UV-Vis diffuse reflectance spectra were obtained on a spectrophotometer (Shimadzu UV-2600, Japan) ranging from 200 to 800 nm.

### **1.4 Photocatalytic activity test**

We evaluated the photocatalytic performance of the as-prepared catalysts by measuring photo-degradation efficiency of Rh B with UV light irradiation using a mercury lamp (300W, diameter 1.8 cm, length 14.5 cm, illumination intensity 8.1346 w/cm<sup>2</sup>)<sup>[2]</sup> at room temperature. The 20 mg of In<sub>2</sub>O<sub>3</sub>/ZnGa<sub>2</sub>O<sub>4</sub>:Cr sample was combined with 40 mL of a 10 mg/L aqueous RhB solution, and continuously stirred in darkness for 40 min to reach the adsorption-desorption equilibrium between the catalyst and the RhB. The suspension was then placed under UV light irradiation, and samples were taken, separated, and analyzed at regular time intervals (every 20 min) with a Shimadzu UV-2600 UV-vis spectrophotometer employed under the same

method.

Table S1. The current  $\text{In}_2\text{O}_3/\text{ZnGa}_2\text{O}_4:\text{Cr}$  composites comparison with other PLNPs literatures with the photo-degradation efficiency for RhB

| Sample Name                                                             | Dyes | Light source | amount | efficiency | References    |
|-------------------------------------------------------------------------|------|--------------|--------|------------|---------------|
| $\text{In}_2\text{O}_3/\text{ZnGa}_2\text{O}_4:\text{Cr}$               | RhB  | 300W UV      | 20 mg  | 80min,98%  | Current paper |
| $\text{Zn}_{0.85}\text{Ga}_2\text{O}_{3.85}$                            | RhB  | 500W UV      | 50 mg  | 100min,87% | [3]           |
| $\text{CaAl}_2\text{O}_4:(\text{Eu},\text{Nd})/\text{TiO}_2-x\text{Ny}$ | RhB  | 450W UV      | 0.16g  | 160min,97% | [4]           |
| $\text{ZnGa}_2\text{O}_4:\text{Cr}^{3+}$                                | RhB  | 500W UV      | 100 mg | 100min,20% | [5]           |
| $\text{ZnGa}_2\text{O}_4:\text{Cr}/\text{Bi}$                           | RhB  | 300W UV      | 20 mg  | 100min,98% | [6]           |
| $\text{Ga}_{1.94}\text{O}_3:\text{Cr}_{0.01}, \text{In}_{0.05}$         | RhB  | 300W UV      | 100 mg | 100min,93% | [7]           |
| $\text{Sr}_2\text{MgSi}_2\text{O}_7:\text{Eu}^{2+},\text{Dy}^{3+}$      | RhB  | 250W UV      | 100 mg | 00min,30%  | [8]           |

Table S2. The parameters of NIR afterglow decay curve fitting

| $\tau_1/\text{s}$ | $A_1$   | $\tau_2/\text{s}$ | $A_2$  | $\tau_3/\text{s}$ | $A_3$   | $\tau_{\text{av}}/\text{s}^{[a]}$ |
|-------------------|---------|-------------------|--------|-------------------|---------|-----------------------------------|
| 11.5              | 4798.92 | 260.53            | 826.15 | 11.53             | 6883.03 | 27.97                             |

$$^{[a]}\tau_{\text{av}} = (A_1\tau_1 + A_2\tau_2 + A_3\tau_3) / (A_1 + A_2 + A_3)$$

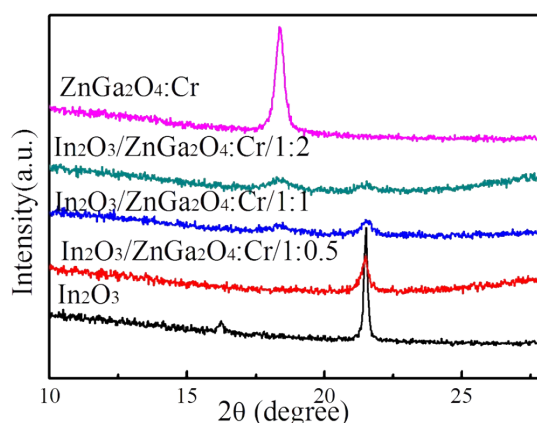

Fig. S1 XRD patterns of flower-like  $\text{In}_2\text{O}_3 \cdot \text{ZnGa}_2\text{O}_4:\text{Cr}$  nanoparticles and  $\text{In}_2\text{O}_3/\text{ZnGa}_2\text{O}_4:\text{Cr}$  composites

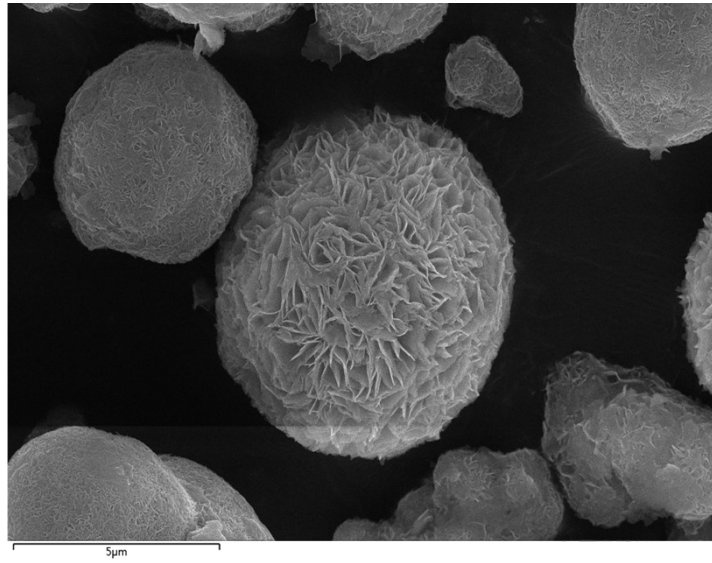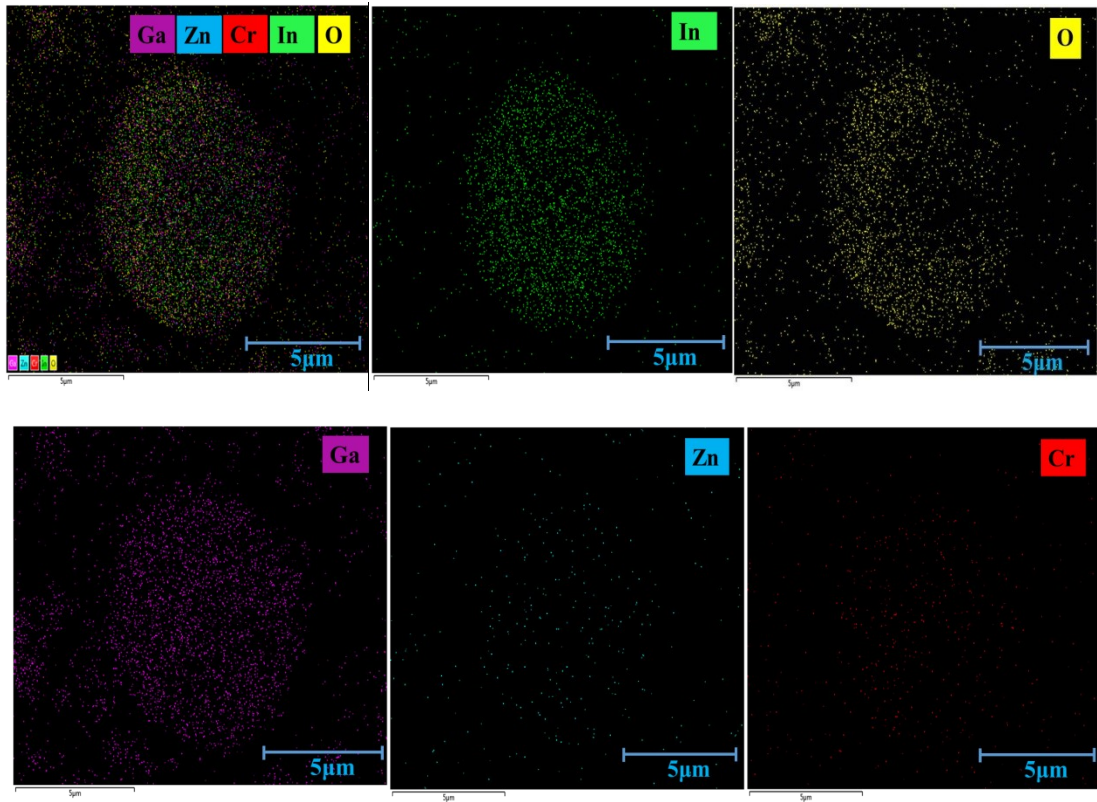

Fig. S2 EDS-mapping images of  $\text{In}_2\text{O}_3/\text{ZnGa}_2\text{O}_4:\text{Cr}/1:1$  composites

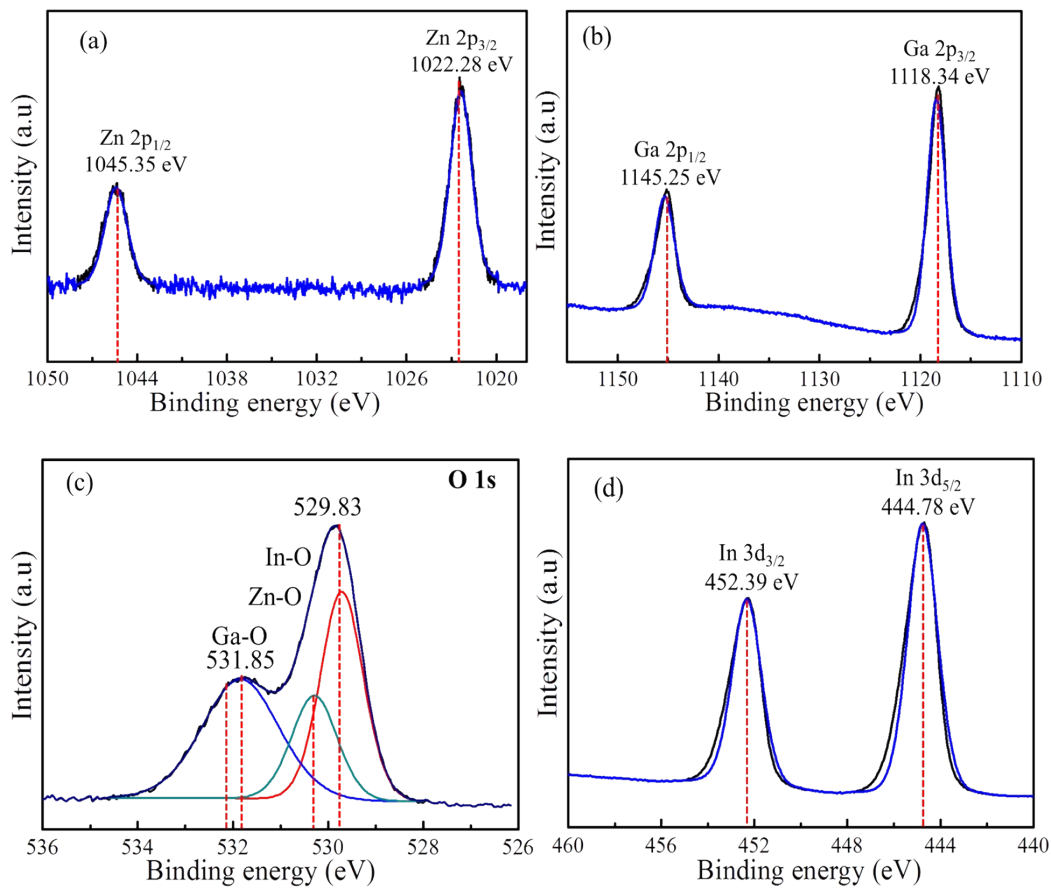

Fig. S3 (a-d) High-resolution XPS spectra of Ga 2p, Zn 2p, In 3d and O 1s for  $\text{In}_2\text{O}_3$ /

$\text{ZnGa}_2\text{O}_4$ :Cr/1:1 composites

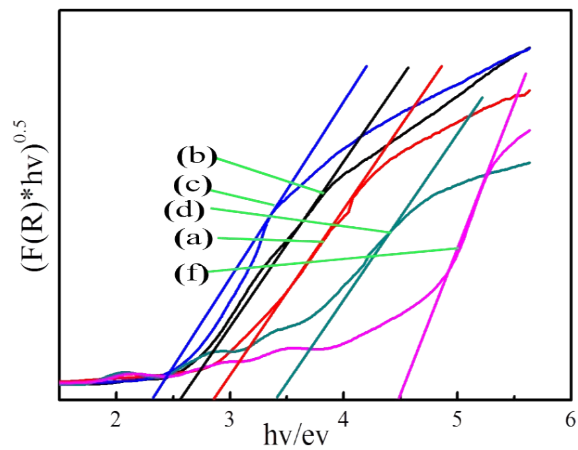

Fig. S4 Band gap of (a)  $\text{In}_2\text{O}_3$ , (b)  $\text{In}_2\text{O}_3/\text{ZnGa}_2\text{O}_4$ :Cr/1:0.5, (c)  $\text{In}_2\text{O}_3/\text{ZnGa}_2\text{O}_4$ :Cr/1:1, (d)  $\text{In}_2\text{O}_3/\text{ZnGa}_2\text{O}_4$ :Cr/1:2, (f)  $\text{ZnGa}_2\text{O}_4$ :Cr

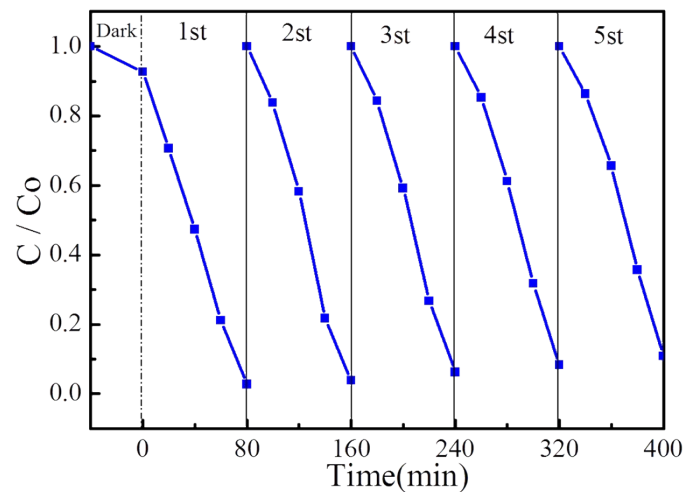

Fig. S5 Recycle tests of the In<sub>2</sub>O<sub>3</sub>/ZnGa<sub>2</sub>O<sub>4</sub>:Cr/1:1 for photo-degradation of RhB

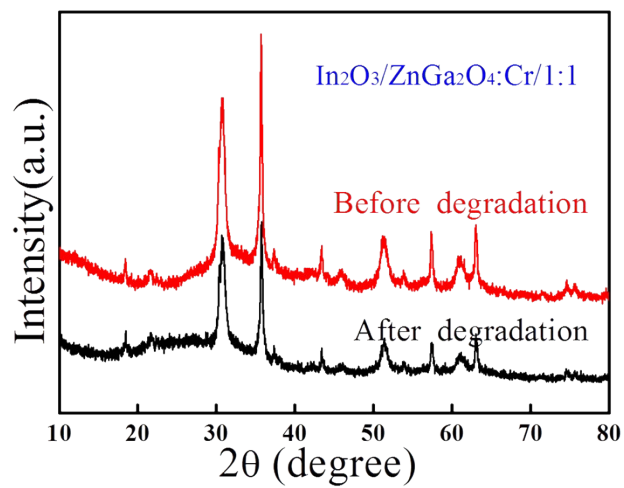

Fig. S6 XRD patterns of the In<sub>2</sub>O<sub>3</sub>/ZnGa<sub>2</sub>O<sub>4</sub>:Cr/1:1 before and after the photocatalytic recycles

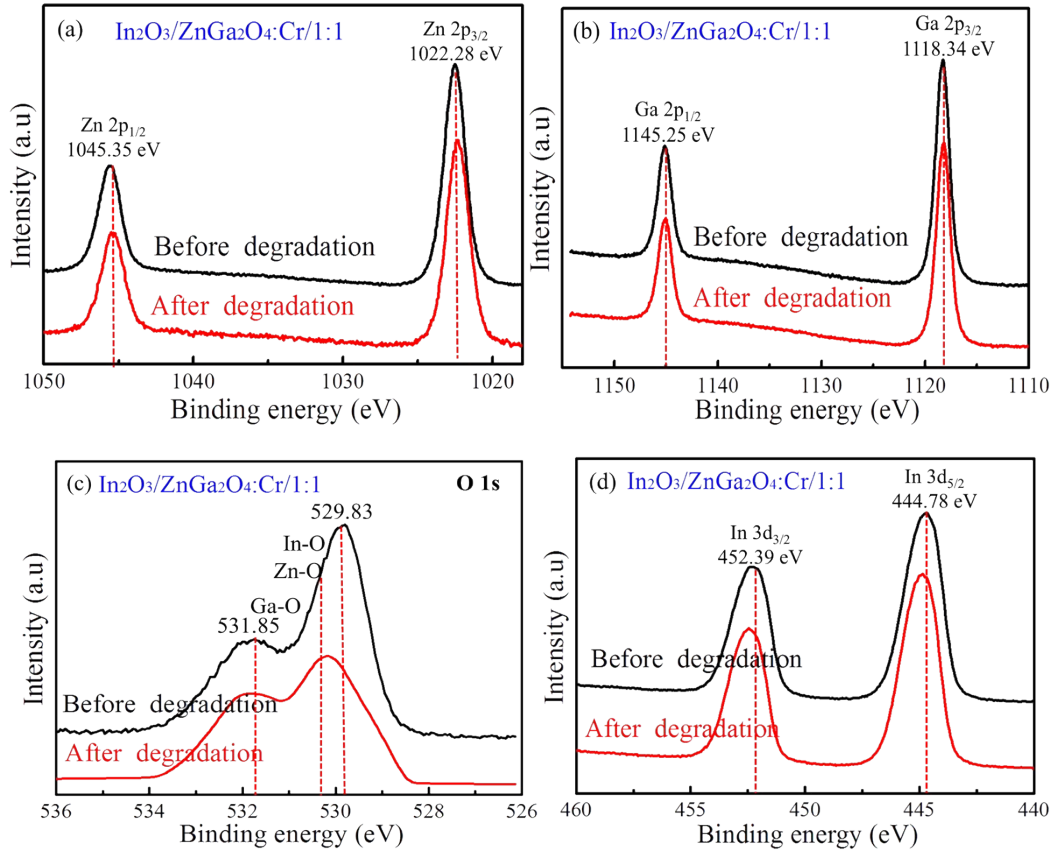

Fig. S7 (a-d) High-resolution XPS spectra of Ga 2p , Zn 2p, In 3d and O 1s for  $\text{In}_2\text{O}_3/\text{ZnGa}_2\text{O}_4:\text{Cr}/1:1$  composites

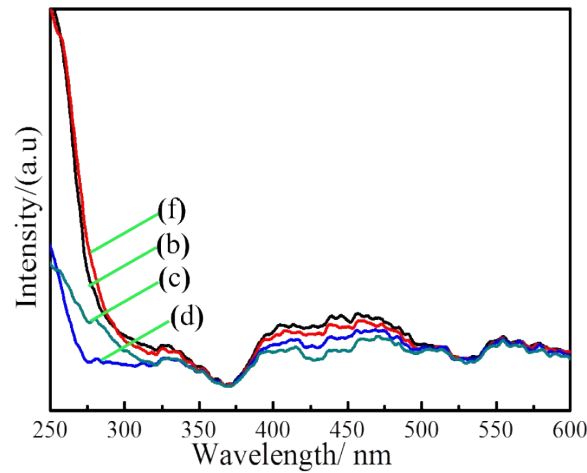

Fig. S8 Phosphorescence excitation spectra of (b)  $\text{In}_2\text{O}_3/\text{ZnGa}_2\text{O}_4:\text{Cr}/1:0.5$ , (c)  $\text{In}_2\text{O}_3/\text{ZnGa}_2\text{O}_4:\text{Cr}/1:1$ , (d)  $\text{In}_2\text{O}_3/\text{ZnGa}_2\text{O}_4:\text{Cr}/1:2$ , (f)  $\text{ZnGa}_2\text{O}_4:\text{Cr}$  (obtained by monitoring 698 nm emission).



#### 4. References

1. B. Han, J. Wang, W. Yang, X. Chen and X. Wei, *Sens. Actuators B Chem.*, 2020, 309, 127788.
2. A. Fairbrother, H. C. Hsueh, J. H. Kim, D. Jacobs, L. Perry, D. Goodwin, C. White, S. Watson, L.P. Sung, *POLYM. DEGRAD. STABIL.*, 2019, 5, 30154-5.
3. D. R. Li, Y. H Wang, K. Xu, H. Zhao and Zh. F H, *RSC Adv.*, 2015, 5, 20972-20976.
4. H.H. Li, S. Yin , T. Sato, *Appl. Catal. B Environ.* 2011,106,586–591.
5. L. Li, Y. H. Wang, H. Li, H. J. Huang and H. Zhao, *RSC Adv.*, 2015,70, 57193–57200.
6. A. Tuerdi and A. Abdukayum, *RSC Advances.*, 2019, 9, 17653-17657.
7. L. Li, K. Xu, Y. H. Wang,\*Z. F. Hu, and H. Zhao, *OPT.MATER.EXPRESS.*, 2016.6, 1022-1030.
8. H. J.Sung, S. C. Jung, and J. S. Kim, *J. Nanosci. Nanotechnol.* 2021, 21, 3729- 3734.
